# Supplementary material for: The Influence of Seasonality on Secondary Metabolite Profiles and Neuroprotective Activities of Moss Hypnum cupressiforme Extracts: In Vitro and In Silico Study
Source: MDPI journal article supplement (doi:10.3390/plants11010123), 2022-01-01
Supplement: s1 [file s1]

# The Influence of Seasonality on Secondary Metabolite Profiles and Neuroprotective Activities of Moss *Hypnum cupressiforme* Extracts: In Vitro and In Silico Study

Tanja M. Lunić<sup>1</sup>, Marija R. Mandić<sup>1</sup>, Mariana M. Oalđe Pavlović<sup>2</sup>, Aneta D. Sabovljević<sup>2</sup>, Marko S. Sabovljević<sup>2, 3</sup>, Biljana Đ. Božić Nedeljković<sup>1\*</sup>, Bojan Đ. Božić<sup>1\*#</sup>

<sup>1</sup> Institute of Physiology and Biochemistry “Ivan Djaja”, Faculty of Biology, University of Belgrade, 11000 Belgrade, Serbia; lunictanja@hotmail.com (T.L.); mandicmarija5@gmail.com (M.M.); biljana@bio.bg.ac.rs (B.B.N.); bbozic@bio.bg.ac.rs (B.B.)

<sup>2</sup> Institute of Botany and Botanical Garden “Jevremovac”, Faculty of Biology, University of Belgrade, 11000 Belgrade, Serbia; mariano@bio.bg.ac.rs (M.O.); aneta@bio.bg.ac.rs (A.S.); marko@bio.bg.ac.rs (M.S.)

<sup>3</sup> Department of Botany, Institute of Biology and Ecology, Faculty of Science, Pavol Jozef Šafárik University in Košice, Mánesova 23, 040 01 Košice, Slovakia

\* Correspondence: bbozic@bio.bg.ac.rs; Tel.: +381 11 303 23 56

# These authors contributed equally to this study.

**Table S1.** Chemical characterization of examined seasonal aspects of moss *H. cupressiforme* ethyl acetate extracts.

| Seasonal Aspect   | TPC<br>(mg GAE/g extract)  | TPAC<br>(mg CAE/g extract)   | TFC<br>(mg QE/g extract)    | TFIC<br>(mg QE/g extract)  | TTC<br>(mg UAE/g extract) |
|-------------------|----------------------------|------------------------------|-----------------------------|----------------------------|---------------------------|
| <b>Spring[10]</b> | 15.33 ± 0.95               | 339.93 ± 14.03               | 58.86 ± 2.82                | 14.11 ± 1.33               | 235.95 ± 4.09*            |
| <b>Summer</b>     | 21.87 ± 1.13* <sup>#</sup> | 661.70 ± 17.14* <sup>#</sup> | 108.21 ± 5.04* <sup>#</sup> | 53.56 ± 3.51* <sup>#</sup> | 256.44 ± 6.88*            |
| <b>Autumn</b>     | 15.12 ± 0.85               | 357.99 ± 7.52                | 80.39 ± 4.56 <sup>#</sup>   | 37.86 ± 1.24 <sup>#</sup>  | 144.79 ± 1.23             |

<sup>#</sup> vs. spring; \* vs. autumn

CAE – caffeic acid equivalents; GAE – gallic acid equivalents; QE – quercetin equivalents; TPAC – total phenolic acid content; TFC – total flavonoid content; TFIC – total flavonol content; TPC – total phenolic content; TTC – total triterpenoid content; UAE – ursolic acid equivalents

**Table S2.** Docking results and interactions between the compounds identified in *H. cupressiforme* docked into AChE active site.

| Compound                                 | $\Delta G$<br>(kcal/mol) | Ki<br>( $\mu M$ ) | Ligand<br>efficiency | Catalytic site<br>interactions* | Interactions out of the catalytic site*                                      |
|------------------------------------------|--------------------------|-------------------|----------------------|---------------------------------|------------------------------------------------------------------------------|
| <b>Galantamine</b>                       | <b>-8.99</b>             | <b>0.26</b>       | <b>-0.43</b>         | <b>His440</b>                   | <b>Trp84, Glu199, Phe288, Phe290, Phe330, Phe331</b>                         |
| <b>Gallic acid</b>                       | -4.67                    | 375.08            | -0.39                | /                               | Tyr121, Trp279, Phe288, Arg289, Phe331                                       |
| <b>Protocatechuic acid</b>               | -4.53                    | 478.55            | -0.41                | /                               | Tyr121, Trp279, Phe288, Arg289, Phe330                                       |
| <b>5-<i>O</i>-Caffeoylquinic acid</b>    | -5.86                    | 51.01             | -0.23                | Ser200, His440                  | Gly118, Gly119, Glu199, Phe330, Ser286, Arg289                               |
| <b><i>p</i>-Hydroxybenzoic acid</b>      | -4.65                    | 388.37            | -0.47                | /                               | Trp279, Ile287, Phe288, Arg289, Phe330                                       |
| <b>Caffeic acid</b>                      | -5.32                    | 126.94            | -0.41                | Ser200, His440                  | Gly80, Trp84, Glu199, Gly441, Tyr442                                         |
| <b>Quercetin 3-<i>O</i>-rutinoside</b>   | -4.79                    | 310.25            | -0.11                | /                               | Gly80, Tyr121, Ser122, Glu199, Phe330, Phe331, Tyr334, Tyr442                |
| <b><i>p</i>-Coumaric acid</b>            | -5.05                    | 198.38            | -0.42                | Ser200                          | Gly80, Glu199, Tyr442                                                        |
| <b>Quercetin-3-<i>O</i>-glucoside</b>    | -6.76                    | 11.12             | -0.20                | His440                          | Asp72, Trp84, Tyr121, Glu199, Phe330                                         |
| <b>Isorhamnetin-3-<i>O</i>-glucoside</b> | -7.34                    | 4.20              | -0.22                | Ser200, His440                  | Asp72, Trp84, Gly118, Tyr121, Glu199, Phe288, Phe290, Phe330, Phe331, Tyr334 |
| <b>Eriodictyol</b>                       | -8.80                    | 0.35              | -0.42                | His440                          | Asp72, Ser81, Trp84, Gly118, Glu199, Phe330, Tyr334                          |
| <b>Apigenin</b>                          | -8.59                    | 0.51              | -0.43                | His440                          | Asp72, Ser81, Gly118, Phe330, Tyr334, Tyr442                                 |
| <b>Naringenin</b>                        | -8.52                    | 0.57              | -0.43                | His440                          | Asp72, Trp84, Gly118, Gly119, Phe330, Tyr334                                 |
| <b>Kaempferol</b>                        | -8.39                    | 0.71              | -0.40                | His440                          | Asp72, Gly119, Phe330, Tyr442                                                |
| <b>Acacetin</b>                          | -8.58                    | 0.51              | -0.41                | His440                          | Asp72, Gly118, Gly119, Ala201, Trp233, Phe290, Phe330, Tyr442                |

\*Van der Waals interactions are not included in this table.

**Table S3.** Docking results and interactions between the compounds identified in *H. cupressiforme* docked into mushroom tyrosinase active site.

| Compound                   | $\Delta G$<br>(kcal/mol) | Ki<br>( $\mu M$ ) | Ligand<br>efficiency | Interaction<br>with Cu <sup>+2*</sup> | Active site<br>interactions* | Interactions out of the active site*                                   |
|----------------------------|--------------------------|-------------------|----------------------|---------------------------------------|------------------------------|------------------------------------------------------------------------|
| <b>Kojic acid</b>          | <b>-4.52</b>             | <b>485.01</b>     | <b>-0.45</b>         | /                                     | His85                        | Cys83, Asn320, Glu322                                                  |
| Gallic acid                | -6.14                    | 31.36             | -0.51                | Cu401                                 | His85, His263                | Asn260, Phe264, Met280, Val283, Ala286                                 |
| Protocatechuic acid        | -6.47                    | 18.00             | -0.59                | Cu401                                 | His61, His85, His263         | Asn260, Met280, Ser282, Val283, Ala286                                 |
| 5-O-Caffeoylquinic acid    | -6.42                    | 19.67             | -0.26                | /                                     | His85, His263                | Met257, Asn260, Thr261, Met280, Gly281, Val283                         |
| p-Hydroxybenzoic acid      | -6.30                    | 24.28             | -0.63                | Cu401                                 | His263                       | Met280, Gly281, Val283, Ala286                                         |
| Caffeic acid               | -5.71                    | 65.68             | -0.44                | /                                     | /                            | Val283                                                                 |
| Quercetin 3-O-rutinoside   | -7.72                    | 2.21              | -0.18                | Cu401                                 | His61, His263                | His244, Val248, Met257, Asn260, Thr261, Phe264, Arg268, Val283, Ala286 |
| p-Coumaric acid            | -6.72                    | 11.86             | -0.56                | /                                     | His263                       | Gly281, Val283                                                         |
| Quercetin-3-O-glucoside    | -5.67                    | 69.73             | -0.17                | /                                     | /                            | His244, Val248, Met257, Asn260, Thr261, Phe264, Arg268, Gly281         |
| Isorhamnetin-3-O-glucoside | -5.71                    | 64.91             | -0.17                | /                                     | His85                        | His244, Val248, Glu256, Thr261, Phe264, Arg268, Gly281, Val283         |
| Eriodictyol                | -5.29                    | 133.42            | -0.25                | /                                     | His263                       | Asn260, Arg268, Pro277, Val283                                         |
| Apigenin                   | -5.73                    | 63.52             | -0.29                | /                                     | His263                       | Asn260, Arg268, Pro277, Ser282, Val283                                 |
| Naringenin                 | -5.45                    | 100.64            | -0.27                | /                                     | His263                       | Asn260, Arg268, Pro277, Val283                                         |
| Kaempferol                 | -5.26                    | 139.28            | -0.25                | Cu400, Cu401                          | His85, His259, His263        | Val248, Glu256, Met280, Val283, Ala286                                 |
| Acacetin                   | -5.39                    | 111.71            | -0.26                | Cu401                                 | His85, His259, His263        | Val248, Met280, Ser282, Val283, Ala286                                 |

\*Van der Waals interactions are not included in this table.

**Table S4.** Docking results and interactions between the compounds identified in *H. cupressiforme* docked into human tyrosinase active site.

| Compound                                | $\Delta G$<br>(kcal/mol) | Ki<br>( $\mu M$ ) | Ligand<br>efficiency | Interaction<br>with Zn <sup>+2</sup> * | Active site interactions*                         | Interactions out of the active<br>site*                           |
|-----------------------------------------|--------------------------|-------------------|----------------------|----------------------------------------|---------------------------------------------------|-------------------------------------------------------------------|
| <b>Kojic acid</b>                       | <b>-4.26</b>             | <b>748.3</b>      | <b>-0.43</b>         | /                                      | His367                                            | Asn364, Met374, Val377, Ser380                                    |
| Gallic acid                             | -6.72                    | 11.84             | -0.56                | Zn6, Zn7                               | His367                                            | Asn364, Met374, Ser375, Val377                                    |
| Protocatechuic acid                     | -6.94                    | 8.19              | -0.63                | Zn6                                    | His202, His367                                    | Asn364, Ser375, Val377                                            |
| 5- <i>O</i> -Caffeoylquinic<br>acid     | -6.70                    | 12.29             | -0.27                | /                                      | His202, His363, His367                            | Phe347, Gln359, Ser360, Asn364,<br>Ser375, Val377, Ser380         |
| <i>p</i> -Hydroxybenzoic<br>acid        | -6.77                    | 10.93             | -0.68                | Zn6                                    | His202, His367                                    | Ser375, Val377                                                    |
| Caffeic acid                            | -7.02                    | 7.17              | -0.54                | Zn6, Zn7                               | /                                                 | Glu203, Phe347, Val377, Ser380                                    |
| Quercetin 3- <i>O</i> -<br>rutinoside   | -5.65                    | 72.49             | -0.13                | /                                      | His363, His367                                    | Asp199, Glu203, Phe347,<br>Gln359, Asn364, Ile368, Ser380         |
| <i>p</i> -Coumaric acid                 | -6.76                    | 11.03             | -0.56                | Zn6, Zn7                               | His367                                            | Ser375, Val377                                                    |
| Quercetin-3- <i>O</i> -<br>glucoside    | -5.75                    | 61.46             | -0.17                | /                                      | His202, His363                                    | Lys306, Gln359, Asn364, Ile368,<br>Met374, Ser375, Ser380         |
| Isorhamnetin-3- <i>O</i> -<br>glucoside | -5.59                    | 80.08             | -0.16                | /                                      | His202, His363                                    | His304, Lys306, Ala357, Gln359,<br>Asn364, Ile368, Ser375, Ser380 |
| Eriodictyol                             | -5.92                    | 45.71             | -0.28                | /                                      | His367                                            | Glu203, Phe347, Met374,<br>Val377, Ser380                         |
| Apigenin                                | -5.66                    | 71.28             | -0.28                | Zn6                                    | His367                                            | Glu203, Phe347, Val377                                            |
| Naringenin                              | -5.68                    | 68.70             | -0.28                | Zn6                                    | His367                                            | Glu203, Phe347, Val377                                            |
| Kaempferol                              | -6.00                    | 40.00             | -0.29                | /                                      | His367                                            | Ile368, Ser375, Val377                                            |
| Acacetin                                | -6.27                    | 25.33             | -0.30                | Zn6                                    | His180, His202, His211,<br>His363, His367, His390 | Phe347, Ile368, Val377, Ser380,<br>Phe386                         |

\*Van der Waals interactions are not included in this table.
